# Supplementary material for: Mining drives extensive deforestation in the Brazilian Amazon
Source: PubMed Central journal article supplement (PMC5647322; doi:10.1038/s41467-017-00557-w), 2017-10-18
Supplement: 41467_2017_557_MOESM1_ESM.pdf [file 41467_2017_557_MOESM1_ESM.pdf]

Type of file: pdf

Title of file for HTML: Supplementary Information

Description: Supplementary Figures, Supplementary Tables, and Supplementary References

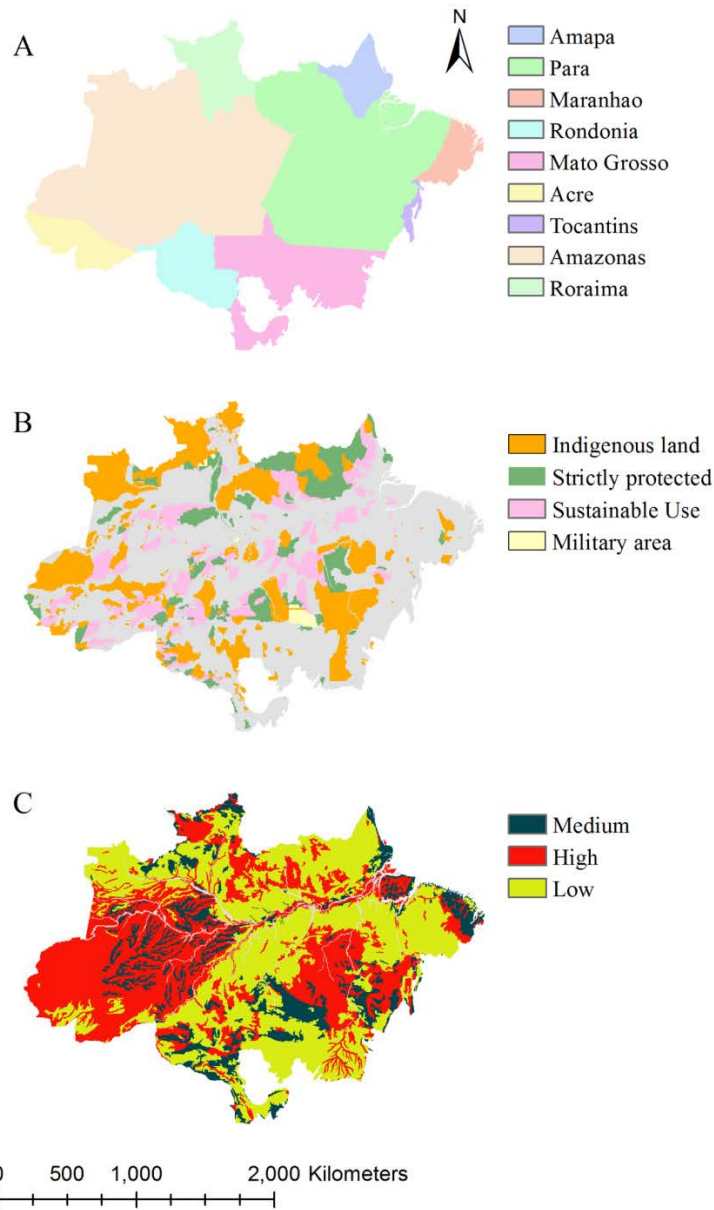

1

2 **Supplementary Figure 1:** Categorical spatial determinants of deforestation, obtained from refs  
 3 1 and 2. A: state boundaries; B: protected areas; and C: agricultural suitability, an indicator of  
 4 suitability of soil and terrain for mechanized crops (produced by ref 3).

5 **Supplementary Figure 2**

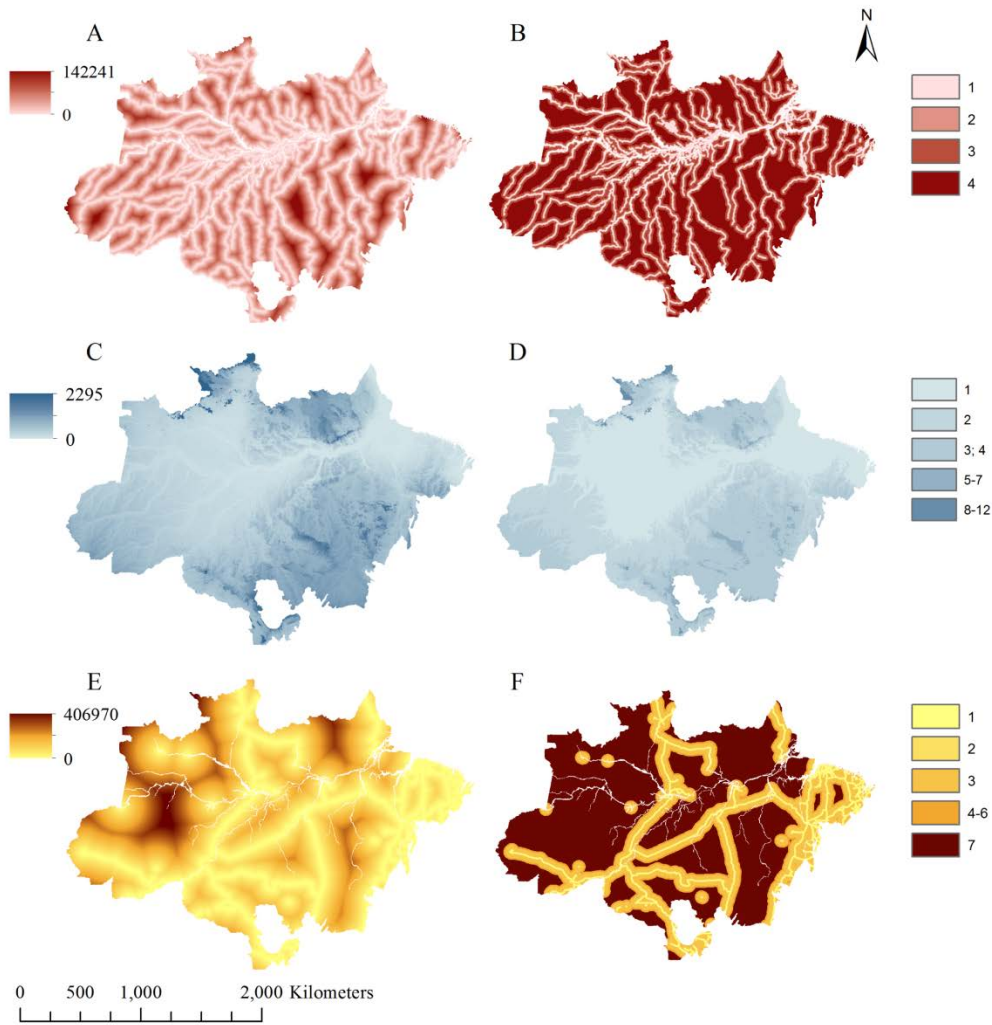

6

7 **Supplementary Figure 2:** Continuous spatial determinants of deforestation and categorical  
8 ranges found to significantly impact deforestation, using the Weights of Evidence method as  
9 described by ref 2. A: distance to major rivers (m); B: four distance to major rivers categories (1:  
10 0–5,000 m; 2: <60,000 m; 3: <65,000 m; 4: <145,000 m); C: elevation (m); D: nine elevation  
11 categories (1: 0–100 m; 2: <200 m; 3: <300 m; 4: <400 m; 5: <500 m; 6: <600 m; 7: <700 m; 8:  
12 <800 m; 9: <2,600 m); E: distance to major roads (m); F: seven distance to major roads

- 13 categories (1: 0–5,000 m; 2: <25,000 m; 3: <35,000 m; 4:<45,000 m; 5: <60,000 m; 6: <80,000;  
14 7: <410,000 m).

15 **Supplementary Table 1:** Covariate balance for ‘matching without replacement’. Values represent the bias (%) between treatment and  
 16 control observations before (U) and after (M) matching for all treatments (mining lease [ML] and surrounding buffers). Controls are  
 17 >100km from ML. Mean values for treatments and unmatched controls (>100km from ML) are shown in Table 3.

| Covariates                 | ML | Surrounding buffers (km) |       |       |       |       |       |       |       |       |        |       |
|----------------------------|----|--------------------------|-------|-------|-------|-------|-------|-------|-------|-------|--------|-------|
|                            |    | 0–10                     | 10–20 | 20–30 | 30–40 | 40–50 | 50–60 | 60–70 | 70–80 | 80–90 | 90–100 |       |
| Protected areas            | U  | -35.7                    | -34.5 | -27.4 | -17.7 | -14.7 | -4.6  | 6.2   | 10.8  | 12.3  | 15.8   | 17.7  |
|                            | M  | 3.4                      | 0.7   | 1.1   | 1.2   | 2     | 2.4   | 4.8   | 3.3   | 4.2   | 0.6    | 0.2   |
| Agricultural suitability   | U  | -89.6                    | -67.9 | -58   | -47.2 | -46.3 | -43.6 | -38.7 | -37   | -36.5 | -31.1  | -32.8 |
|                            | M  | 3.1                      | 2.3   | 3.5   | 4.1   | 3.5   | 2.8   | 3.2   | 1.5   | 1.5   | 2.9    | 0.9   |
| Distance to rivers         | U  | 23.1                     | -6.7  | -22.2 | -23.1 | -23.4 | -22   | -20.2 | -17.9 | -17.2 | -14.7  | -13   |
|                            | M  | 5.9                      | 1     | 1.5   | 0.5   | 0.6   | 3.3   | 2.3   | 0.4   | -0.6  | 0.2    | -0.5  |
| Elevation                  | U  | 27.6                     | 5.9   | -2.3  | -1.2  | -4.3  | -5.9  | -6    | -7.2  | -6.3  | -5.8   | -0.1  |
|                            | M  | 4.8                      | -3    | -3.8  | -4.6  | -5.9  | -5.4  | -5.8  | -3.9  | -2.2  | -1.6   | -0.5  |
| Distance to roads          | U  | -62.8                    | -75.5 | -62   | -52.2 | -46.3 | -40.2 | -32.7 | -28.1 | -24.1 | -25    | -26.4 |
|                            | M  | -5.3                     | 2.9   | 0.2   | 4.4   | 6.2   | 2.9   | 7.2   | 7.6   | 4.7   | 1      | 1     |
| Amazonas                   | U  | -74.6                    | -84.5 | -75.7 | -67.2 | -61.4 | -56.4 | -55.4 | -55.3 | -53.4 | -55.3  | -57.1 |
|                            | M  | -0.9                     | -0.1  | -0.3  | -0.1  | -0.1  | -0.8  | -0.2  | 0.1   | 0     | 0      | 0     |
| Rondonia                   | U  | 45.8                     | 56.8  | 57.4  | 53.3  | 51.3  | 50.3  | 49    | 45.1  | 36.4  | 30     | 23.4  |
|                            | M  | -9.6                     | -1.1  | -3.9  | 0.7   | -4.9  | -5.2  | -1.9  | -0.2  | 4     | 0.4    | 1     |
| Tocantins                  | U  | 4.2                      | -17.8 | 5.2   | -10.1 | 6.9   | 6.9   | -31.9 | -31.2 | -20.3 | 6.9    | 4.2   |
|                            | M  | -0.4                     | 6.2   | -3.3  | 4.6   | -2.9  | -4.4  | 5.1   | 6.2   | 6.7   | -7.7   | -1.4  |
| Maranhao                   | U  | 0.2                      | 16.8  | 12.7  | 20.5  | 23.7  | 22.9  | 20.9  | 19.2  | 15.4  | 14     | 13.1  |
|                            | M  | -0.5                     | -3.7  | -5.3  | 3.9   | 13.4  | 11.3  | 7.8   | 7.9   | -3.1  | 2.7    | -0.5  |
| Para                       | U  | 81.2                     | 64.2  | 49.7  | 43.1  | 36.4  | 33.3  | 32.1  | 32.6  | 34.3  | 42     | 47.8  |
|                            | M  | 1.3                      | -2.3  | -0.5  | -3.2  | -2.9  | -1.3  | -0.7  | -0.5  | -0.6  | -0.8   | -0.4  |
| Amapa                      | U  | 17.9                     | 29.1  | 34.8  | 33.6  | 34.1  | 34.5  | 35.9  | 37    | 35.6  | 32     | 28.6  |
|                            | M  | 15.8                     | 13.6  | 10.1  | 5.6   | 4.6   | 3.6   | 4.6   | 2.8   | 2.4   | 1.8    | 0.6   |
| Average bias post-matching |    | 1.6                      | -0.68 | -0.06 | 0.22  | 1.24  | 0.84  | -0.96 | -1.11 | -0.91 | -0.05  | 0.04  |

18 **Supplementary Table 2:** Deforestation (2005–15) comparisons between treatments (mining leases and surrounding buffers) and  
19 matched controls, using alternative matching methods (‘without replacement’, ‘without replacement using callipers’, and ‘with  
20 replacement dropping the 40% of treatment observations and 55% of control observations that fell within protected areas’). ‘Matched  
21 controls (n)’ represents the number of unique control observations used in ‘matching with replacement’. Matched controls for without  
22 replacement methods equal the number of treatment observations (see ‘forest cover in 2005’, Table 3). ‘Difference’ is the difference in  
23 deforestation between treatments and matched controls, i.e. the propensity score matching estimator. To control for remaining post-  
24 matching bias, we regressed deforestation on the dummy variable for mining leases and all other spatial variables used in the model,  
25 using the matched sample (treatment and control observations); this is the bias adjusted estimator. Placebo tests show the t-statistic for  
26 comparisons in deforestation rates between controls and a secondary set of matched controls (see Methods).

| Treatment | Without replacement |                 |                  |                     | Without replacement + callipers<br>(threshold=0.01) |                 |                  |                     | With replacement,<br>dropping protected areas |               |                 |                  |                     |
|-----------|---------------------|-----------------|------------------|---------------------|-----------------------------------------------------|-----------------|------------------|---------------------|-----------------------------------------------|---------------|-----------------|------------------|---------------------|
|           | Deforestation       |                 | Bias<br>adjusted | Placebo<br>(t stat) | Deforestation                                       |                 | Bias<br>adjusted | Placebo<br>(t stat) | Matched<br>controls<br>(n)                    | Deforestation |                 | Bias<br>adjusted | Placebo<br>(t stat) |
|           | Cont<br>-rol        | Diff-<br>erence |                  |                     | Cont<br>-rol                                        | Diff-<br>erence |                  |                     |                                               | Cont<br>-rol  | Diff-<br>erence |                  |                     |
| ML        | 0.121               | 0.021           | 0.023***         | 0.90                | 0.121                                               | 0.021           | 0.023***         | 0.90                | 211                                           | 0.094         | 0.111           | 0.109***         | -0.61               |
| 0–10 km   | 0.134               | 0.013           | 0.011***         | 4.10**              | 0.132                                               | 0.013           | 0.011***         | 3.78**              | 441                                           | 0.159         | 0.066           | 0.065***         | 0.00                |
| 10–20 km  | 0.120               | 0.030           | 0.030***         | 3.89**              | 0.119                                               | 0.031           | 0.031***         | 3.68**              | 469                                           | 0.167         | 0.064           | 0.066**          | 0.06                |
| 20–30 km  | 0.114               | 0.018           | 0.024***         | 7.82**              | 0.113                                               | 0.018           | 0.025***         | 5.75**              | 477                                           | 0.168         | 0.047           | 0.051**          | 0.59                |
| 30–40 km  | 0.098               | 0.016           | 0.017***         | 0.88                | 0.098                                               | 0.016           | 0.016***         | 1.71                | 515                                           | 0.130         | 0.060           | 0.062***         | 0.07                |
| 40–50 km  | 0.087               | 0.009           | 0.012***         | 1.61                | 0.087                                               | 0.009           | 0.012***         | 1.52                | 546                                           | 0.098         | 0.079           | 0.080***         | -0.21               |
| 50–60 km  | 0.078               | 0.002           | 0.010***         | -0.60               | 0.078                                               | 0.002           | 0.010***         | -0.58               | 558                                           | 0.120         | 0.047           | 0.046**          | 0.07                |
| 60–70 km  | 0.072               | 0.002           | 0.011***         | -0.58               | 0.073                                               | 0.002           | 0.011***         | 1.25                | 561                                           | 0.112         | 0.052           | 0.051**          | -0.49               |
| 70–80 km  | 0.061               | 0.004           | 0.009***         | 0.09                | 0.061                                               | 0.004           | 0.009***         | -0.2                | 591                                           | 0.126         | 0.020           | 0.022            | 0.49                |
| 80–90 km  | 0.051               | 0.008           | 0.008***         | -0.80               | 0.051                                               | 0.008           | 0.008***         | -0.3                | 541                                           | 0.113         | 0.026           | 0.029            | 0.73                |

|           |       |       |       |       |  |       |       |       |       |  |     |       |       |       |       |
|-----------|-------|-------|-------|-------|--|-------|-------|-------|-------|--|-----|-------|-------|-------|-------|
| 90–100 km | 0.053 | 0.002 | 0.002 | -0.45 |  | 0.053 | 0.002 | 0.002 | -0.45 |  | 538 | 0.137 | 0.011 | 0.012 | -0.43 |
|-----------|-------|-------|-------|-------|--|-------|-------|-------|-------|--|-----|-------|-------|-------|-------|

27 Stars denote significant differences: \*\*\*  $p < 0.001$ , \*\*  $p < 0.01$ .

28 **Supplementary Table 3:** Socio-economic data used to investigate potential impact pathways of  
 29 mining induced deforestation. Table shows the years of data collection, and a description of each  
 30 variable. All variables were collected at the spatial scale of municipalities.

| <b>Variable</b>     | <b>Reference</b> | <b>Year</b>                                                                                | <b>Variable</b>                    | <b>Description</b>                                                                                                                                                                                                                                                                                     |
|---------------------|------------------|--------------------------------------------------------------------------------------------|------------------------------------|--------------------------------------------------------------------------------------------------------------------------------------------------------------------------------------------------------------------------------------------------------------------------------------------------------|
| Economic activities | 4                | Annual data available for years 2006 to 2014. Data from 2012 were used here.               | Companies<br>Employees<br>Salaries | Total number of registered companies<br>Average number of employees per company<br>Average salary per employee                                                                                                                                                                                         |
| Population dynamics | 5                | Data available for years: 1991, 2000, 2010.                                                | Population<br>Population growth    | Number of residents in 2010<br>Change in the number of residents between 2000 and 2010                                                                                                                                                                                                                 |
| Wood production     | 6                | Annual data available for 1990 to 2013. Data represent aggregated totals for 2005 to 2014. | Fuelwood<br>Roundwood<br>Charcoal  | Quantity of fuelwood (m <sup>3</sup> ) produced from clearing forested land (excludes silvicultural production)<br>Quantity of roundwood (m <sup>3</sup> ) produced from clearing forested land (excludes silvicultural production)<br>Quantity of charcoal (t) produced from clearing natural forests |
| Food production     | 7                | Annual data available for 1990 to 2013. Data represent aggregated totals for 2005 to 2014. | Permanent crops<br>Temporary crops | Area harvested (ha) from permanent crops<br>Area harvested (ha) from temporary crops                                                                                                                                                                                                                   |

31

32



33 Supplementary References  
34

- 35 1. Soares-Filho BS, *et al.* Modelling conservation in the Amazon basin. *Nature* **440**, 520-  
36 523 (2006).
- 37 2. Soares-Filho B, *et al.* Role of Brazilian Amazon protected areas in climate change  
38 mitigation. *Proceedings of the National Academy of Sciences* **107**, 10821-10826 (2010).  
39
- 40 3. Nepstad DC, Stickler CM, Filho BS, Merry F. Interactions among Amazon land use,  
41 forests and climate: prospects for a near-term forest tipping point. *Philosophical*  
42 *Transactions of the Royal Society B: Biological Sciences* **363**, 1737-1746 (2008).
- 43 4. IBGE. Cadastro Central de Empresas. Instituto Brasileiro de Geografia e Estatística  
44 (2014).
- 45 5. IBGE. Censo Demográfico. Instituto Brasileiro de Geografia e Estatística (2014).
- 46 6. IBGE. Produção da Extração Vegetal e da Silvicultura. Instituto Brasileiro de Geografia e  
47 Estatística (2014).
- 48 7. IBGE. Produção Agrícola Municipal. Instituto Brasileiro de Geografia e Estatística  
49 (2014).  
50
